# **MADET: A Manually Curated Knowledgebase for Microbiomic Effects on Efficacy and Toxicity of Anticancer Treatments**

Jie Zhang<sup>1,\*</sup>, Xiqian Chen<sup>2,\*</sup>, Jiabin Zou<sup>3,4,\*</sup>, Chen Li<sup>5</sup>, Wanying Kang<sup>1</sup>, Yang Guo<sup>1</sup>,  
Sheng Liu<sup>1</sup>, Wenjing Zhao<sup>1</sup>, Xiangyu Mou<sup>1,4,#</sup>, Jiayuan Huang<sup>1,#</sup>, Jia Ke<sup>3,4,#</sup>

<sup>1</sup>Center for Infection and Immunity Studies, School of Medicine, Shenzhen Campus of Sun Yat-Sen University, Shenzhen, Guangdong 518107, China.

<sup>2</sup>Independent Researcher, Beijing 100182, China.

<sup>3</sup>Department of Colorectal Surgery, The Sixth Affiliated Hospital, Sun Yat-Sen University, Guangzhou, Guangdong 510655, China.

<sup>4</sup>Guangdong Provincial Key Laboratory of Colorectal and Pelvic Floor Diseases, The Sixth Affiliated Hospital, Sun Yat-Sen University, Guangzhou, Guangdong 510655, China.

<sup>5</sup>Monash Biomedicine Discovery Institute and Department of Biochemistry and Molecular Biology, Monash University, Victoria 3800, Australia.

\*These authors contributed equally to this work.

#Correspondence should be addressed to J.K. ([kjia@mail.sysu.edu.cn](mailto:kjia@mail.sysu.edu.cn)), J.H. ([huangjy389@mail.sysu.edu.cn](mailto:huangjy389@mail.sysu.edu.cn)) or X.M. ([mouxy5@ms.sysu.edu.cn](mailto:mouxy5@ms.sysu.edu.cn)).

1 **Abstract**

2 A plethora of studies have reported the associations between microbiota and multiple  
3 diseases, leading to at least four databases to demonstrate microbiota-disease  
4 associations, i.e., gutMDisorder, mBodyMap, GMrepo and Amadis. Moreover, gut  
5 microbiota also mediates drug efficacy and toxicity, whereas a comprehensive database  
6 to elucidate the microbiota-drug associations is lacking. Here we report an open-access  
7 knowledgebase, MADET (Microbiomics of Anticancer Drug Efficacy and Toxicity),  
8 which harbors 453 manually annotated microbiota-drug associations from 24 papers.  
9 MADET provides user-friendly functions allowing users to freely browse, search, and  
10 download the data conveniently from the database. Users can customize their search  
11 filters in MADET using different types of keywords, including bacterial name (e.g.,  
12 *Akkermansia muciniphila*), anticancer treatment (e.g., anti-PD-1 therapy) or cancer  
13 type (e.g., lung cancer) with different types of experimental evidence of microbiota-  
14 drug association and causation. We have also enabled user submission to further enrich  
15 the data document in MADET. The MADET database is freely available at  
16 <https://www.madet.info>. We anticipate that MADET will serve as a useful resource for  
17 a better understanding of the microbiota-drug associations and facilitate the future  
18 development of novel biomarkers and live biotherapeutic products for anticancer  
19 therapies.

20 **Keywords:** database, microbiota, anticancer treatment, efficacy, toxicity.

21

## 22 1. Introduction

23 Gut microbiota plays an important role in carcinogenesis and cancer treatment  
24 outcomes [1, 2]. Bacteria including *Helicobacter pylori* [3], *Fusobacterium nucleatum*  
25 [4], *Peptostreptococcus anaerobius* [5], enterotoxigenic *Bacteroides fragilis* [6],  
26 polyketide synthase-positive (*pks*<sup>+</sup>) *Escherichia coli* [7], and *Campylobacter jejuni* [8],  
27 have been reported to contribute to carcinogenesis and tumor development via releasing  
28 toxins and activating procarcinogenic signaling pathways [1, 2, 4]. On the other hand,  
29 microbes including *Lactobacillus reuteri* [9], *Lactobacillus gallinarum* [10], and  
30 *Streptococcus thermophilus* [11] are reported to suppress tumorigenesis and cancer  
31 progression via multiple pathways, such as inhibiting the metabolism of tumor  
32 proliferation [11]. To date, several databases have been constructed to document these  
33 positive or negative associations between gut microbiota and tumor development, such  
34 as mBodyMap [12], gutMDisorder [13], GMrepo [14], and Amadis [15]. However, the  
35 important effects of microbiota on the efficacy and toxicity of anticancer drugs are not  
36 systematically documented.

37 Gut microbiota modulates the efficacy and toxicity of anticancer drugs through  
38 multiple mechanisms including immunomodulation, metabolism, and enzymatic  
39 degradation [16]. Notably, the efficacy of immunotherapies (e.g., anti-PD-1 therapy) in  
40 cancer patients is positively associated with the abundance of some specific bacterial  
41 species (e.g., *Akkermansia muciniphila* [17], *Bacteroides fragilis* and *Bifidobacterium*  
42 *longum* [18]). These commensal gut microbes may reinforce the efficacy of immune  
43 checkpoint inhibitors (ICIs) via regulation of the host immune responses (such as  
44 increased level of CD4<sup>+</sup> T cells and/or CD8<sup>+</sup> T cells in the tumor microenvironment)  
45 [17, 19]. Several live biotherapeutic products are under development for their  
46 synergistic anticancer effects with immunotherapies, and the clinical trials based on  
47 these bacterial products are ongoing, including CBM588 (a *Clostridium butyricum*  
48 strain) for treating advanced kidney cancer [20]. Moreover, toxicities of anticancer  
49 treatments are impacted by gut microbiota. For example, chemotherapeutic agent

50 irinotecan may be metabolized by gut bacterial  $\beta$ -glucuronidase (which can be found in  
51 four major bacterial phyla: Bacteroidetes, Firmicutes, Verrucomicrobia,  
52 and Proteobacteria) into its toxic form SN-38, and therefore may inflict toxicity in the  
53 gastrointestinal tract, such as epithelial damage and diarrhea [21]. Another example is  
54 that immune-related adverse effect (irAE) of ICI therapy, most commonly colitis, has  
55 been reported to be associated with the abundance of the Bacteroidetes phylum in the  
56 human gut [22]. In a nutshell, microbiota could be employed as a potential biomarker  
57 for predicting treatment outcomes and an interventional target for improving the  
58 effectiveness of cancer therapies. We therefore argue that with the accumulating  
59 evidence of the important roles of microbiota in anticancer treatments, including  
60 chemotherapeutic agents, radiotherapy and immunotherapies, it is urgent to develop an  
61 open-access and user-friendly knowledgebase to allow for documenting, retrieving and  
62 sharing experimental data of these microbiotas and their effects on the efficacy and  
63 toxicity of anticancer drugs.

64 To this end, in this study we implement a knowledgebase, termed MADET  
65 (Microbiomics of Anticancer Drug Efficacy and Toxicity; freely available at  
66 <https://www.madet.info>), to provide the most up-to-date manual curation of reports on  
67 the interplays between microbiota and anticancer drugs for the researchers in  
68 microbiology, pharmacology and other related areas (**Figure 1**). To the best of our  
69 knowledge, MADET is the first database providing experimental evidence of  
70 associations between microbiota and anticancer drugs with user-friendly functionalities,  
71 including data download and flexible keyword search with bacterial name, treatment,  
72 or cancer type. We anticipate MADET will serve as a steppingstone for the  
73 development of novel microbiomic biomarkers for predicting the outcome of anticancer  
74 drugs and live biotherapeutic products for improving the outcome of anticancer drugs.

75

76

77

## 78 2. Methods

### 79 2.1. Data collection

80 To collect the state-of-the-art scientific reports on pharmacomicrobiomics of  
81 anticancer drugs, we searched the literature using the keywords “microbiome” and  
82 “cancer treatment (e.g., 5-FU, anti-PD-1 or radiotherapy, etc)” on PubMed and  
83 extracted 24 published papers involving how the composition of microbiota is  
84 associated with the efficacy and toxicity of anticancer drugs. Fourteen of the 24 papers  
85 focused on the associations between microbiota and ICIs, and six papers examined the  
86 effects on chemotherapeutic agents and their combinations (**Figure 2A**). We further  
87 included four publications on cancer radiotherapy studies, given the fact that  
88 radiotherapy has been widely applied to cancer treatment. In total, 453 associations  
89 between microbiota and drug outcome have been manually identified and recorded in  
90 MADET.

91 We also analyzed our collected studies based on the cancer type and the country  
92 where the research was conducted (**Figure 2BC**). Melanoma and gastrointestinal  
93 cancers attracted major attention from anti-cancer pharmacomicrobiomics researchers,  
94 which comprise 7 and 6 papers, respectively. We further set up several criteria in terms  
95 of experimental types for categorizing the collected 453 microbiota-drug associations:  
96 “Limited” (only with animal data); “Moderate” (clinical observation of association);  
97 “Relatively strong” (clinical observation of association and experimental validation of  
98 causation using animal model); and “Strong” (clinical observation of association and  
99 validated of causation by clinical trial). Among those, the majority (413 associations)  
100 have a “Moderate” strength of evidence (**Figure 2D**). Only one association was labeled  
101 as “Strong”: a *Clostridium butyricum* strain CBM 588 increases the effect of  
102 immunotherapy (nivolumab and ipilimumab) in treating patients with kidney cancer,  
103 which was validated by a Phase 1 clinical trial [20].

104

105

## 106 **2.2. MADET construction**

107 MADET was developed and implemented utilizing widely applied open-source  
108 packages including Vue (front-end), Spring Boot and MyBaits (back-end), and MySQL  
109 (relational database design), to provide reliable delivery of a complex scalable web  
110 application (**Figure 1**). The modern and separate front-end/back-end architecture of  
111 MADET allows collaboration between developers with different specializations and  
112 simplifies the upgrading process for future improvement. The main proxy uses a high-  
113 performance Nginx server (<https://www.nginx.com>) to communicate between the front-  
114 end and the back-end programs. The front-end of MADET was constructed with a  
115 commercial-used open-source Vue.js framework (<https://vuejs.org>) and Element UI  
116 Toolkit (<https://element.eleme.io>) for the design of a professional user interface  
117 experience design. The back-end of MADET has been designed to be a microservice  
118 architecture software, which is facilitated by Java Spring Boot  
119 (<https://spring.io/projects/spring-boot>). The microservice architecture implemented  
120 three independent functions modules (services), i.e., the search, browse, and upload  
121 services. This highly modular architecture allows MADET to provide software as a  
122 service (SaaS) and the possibility of turning MADET into a mobile app and adding new  
123 services in the future. The actual data stored in MySQL (sql) can be easily converted to  
124 other data formats such as xlsx (Microsoft Excel) and csv (comma separated values).  
125 The MADET website resides on Tencent Cloud to leverage the burden of various  
126 website configurations and security measures while preserving full control of the web  
127 application and data integrity to MADET developers.

128

## 129 **3. MADET utilities**

130 MADET provides four major functionalities, including database browsing,  
131 searching, downloading and user submission with a user-friendly interface (**Figure 3**).  
132 The *Homepage* contains two sections. The top section provides a brief introduction to  
133 the MADET database and the generic statistical information, such as treatment and

134 cancer type, of the current MADET version using interactive pie charts. Users can click  
135 on each pie chart to be redirected to corresponding result pages. For example, if “China”  
136 from the pie chart is clicked, MADET will show filtered search results that contain  
137 studies conducted in China. The Browse page enables users to view all data available  
138 on MADET and allows users to set customized filters to shortlist the results. Each  
139 MADET entry contains twelve columns, including Bacterium, Treatment, Potential  
140 effects on efficacy, Potential effects on toxicity, Cancer type and Reference, Treatment,  
141 Potential effects on efficacy, Potential effects on toxicity, and Cancer type. All selected  
142 data will be displayed as a table. Several column headers are provided with an arrow,  
143 clicking on which will show a drop-down menu of subcategories will appear for users  
144 to narrow down the results. The filter will auto-apply when a new attribute is selected,  
145 and the table will auto-refresh to display the filtered results. Multiple subcategories  
146 from different attributes can be selected at the time for customized filters. If the number  
147 of entries exceeds the limit on one page, users can click the pages button at the bottom  
148 of the table to scroll through the data. Searches on microbiota-drug interactions of  
149 interest is straightforward. Three types of searching are available on the “Search” page,  
150 including “Bacterium”, “Treatment”, and “Cancer type”. After obtaining the desired  
151 keywords provided by the user, the search engines will only search the database entries  
152 with the provided keywords. We have also provided default keyword for each search  
153 type. Users can simply click the “Search” button to see the results extracted using the  
154 default keywords. The search results are displayed as a table similar to the table on the  
155 Browse page. A drop-down menu is provided from “Treatment” and “Cancer type”,  
156 respectively, to narrow down the search results of interest. MADET allows users to  
157 download its data for high-throughput or computational analysis. Users can download  
158 the sql (MySQL) or xlsx format of the data collected by MADET through the download  
159 page. To further enrich the data documented in MADET, we have enabled users to  
160 submit their own research data via our submission function on the “Upload” page. We  
161 request the users to describe the information that should be covered in our database in

162 detail, including treatment, bacterium and cancer type. The submitted data will be  
163 manually reviewed by the MADET team prior to data publishing in the database. The  
164 users will be contacted if more clarification is needed via their name and email address  
165 provided during data submission. We will confirm with the users once their data has  
166 been accepted for publishing in the MADET database.

167

#### 168 **4. Case study**

169 Some interesting findings involving microbiota-drug associations can be  
170 discovered using our MADET database. First, certain bacterial species may exert  
171 opposite effects on modulating the efficacy of different drugs. For instance, by  
172 searching MADET with the keyword “*Fusobacterium nucleatum*”, we are able to see  
173 that the bacterial species *F. nucleatum* is negatively associated with the decreased  
174 anticancer effects of 5-FU chemotherapy for colorectal cancer [23] as well as positively  
175 related to the promoted efficacy of PD-L1 blockade on the other hand [19]. This  
176 suggests that a comprehensive evaluation may be needed prior to the administration of  
177 next-generation probiotics targeting microbiota-drug association.

178 Second, even for the same anticancer drug, we found that same bacterial species  
179 showed opposite potential effects against different cancer type or across different  
180 countries. For example, searching “*Roseburia intestinalis*” in MADET showed this  
181 species is positively associated with the efficacy of immune checkpoint inhibitor (ICI)  
182 therapy in patients with lung cancer in France [24], whereas *R. intestinalis* was reported  
183 to be negatively associated with the efficacy of ICI therapies in melanoma patients in  
184 the USA [18]. Similar results on *Parabacteroides distasonis*, *Lactobacillus vaginalis*,  
185 and *Eubacterium hallii* can be unveiled through searches in MADET with relevant  
186 keywords. These findings highlight that the factors including cancer types, geographic  
187 locations and analytical methods may affect the conclusion of microbiomic effect on  
188 anticancer drugs. Moreover, the functional differences may be strain dependent, i.e.,  
189 heterogeneous bacterial strains within the same species may have opposite functions on



190 drug outcome. Thus, MADET provides a valuable platform to summarize and analyze the  
191 precise mechanism of the observed microbiota-drug associations demonstrated in the  
192 current literature.

193

## 194 **5. Conclusion**

195 With the rapid expansion of our knowledge of gut microbiota during the past  
196 decade, multiple bacterial species have been identified as promising candidates for  
197 biomarkers of drug susceptibility and live biotherapeutic products for improving drug  
198 outcomes. By manually curating 453 associations between microbiota and anticancer  
199 drugs with a variety of factors including bacterial species, treatment, cancer type and  
200 strength of evidence, the MADET database provides the first comprehensive  
201 knowledgebase of the associations between microbiota and anticancer therapeutic  
202 outcomes. Users utilize MADET to examine the up-to-date microbiota-drug  
203 associations of their bacterium/drug of interest, to advance the generation of novel  
204 research hypotheses. MADET will keep evolving with the new data provided by the  
205 novel studies on microbiota-drug associations. We anticipate that MADET will serve  
206 as a convenient platform for facilitating pharmacomicrobiomics research, including the  
207 development of novel biomarkers for predicting drug outcomes as well as novel live  
208 biotherapeutic products for improving the outcomes of anticancer drugs.

209

210 **Data availability:** The MADET database is freely available at <https://www.madet.info>.

211 Any code or other data related this work will be available upon reasonable request.

212

213 **Funding:** This work is supported by National Key Research and Development Program  
214 of China (2020YFA0907803), Shenzhen Science and Technology Innovation Program  
215 (KQTD20200820145822023), and National Natural Science Foundation of China  
216 (31900056 and 32000096).

217

218 **Disclosure of interest:** The authors report no conflict of interest.

219

## 220 **References**

- 221 [1] N.L. Ting, H.C. Lau, J. Yu, Cancer pharmacomicrobiomics: targeting microbiota to  
222 optimise cancer therapy outcomes, *Gut* (2022) 1-14.
- 223 [2] S.L. Clay, D. Fonseca-Pereira, W.S. Garrett, Colorectal cancer: the facts in the case  
224 of the microbiota, *J Clin Invest* 132(4) (2022) 1-10.
- 225 [3] L. Cao, S. Zhu, H. Lu, M. Soutto, N. Bhat, Z. Chen, D. Peng, J. Lin, J. Lu, P. Li, C.  
226 Zheng, C. Huang, W. El-Rifai, *Helicobacter pylori*-induced RASAL2 through  
227 activation of nuclear factor-kappaB promotes gastric tumorigenesis via beta-catenin  
228 signaling axis, *Gastroenterology* 162(6) (2022) 1716-1731 e17.
- 229 [4] M. Castellarin, R.L. Warren, J.D. Freeman, L. Dreolini, M. Krzywinski, J. Strauss,  
230 R. Barnes, P. Watson, E. Allen-Vercoe, R.A. Moore, R.A. Holt, *Fusobacterium*  
231 *nucleatum* infection is prevalent in human colorectal carcinoma, *Genome Res* 22(2)  
232 (2012) 299-306.
- 233 [5] X. Long, C.C. Wong, L. Tong, E.S.H. Chu, C. Ho Szeto, M.Y.Y. Go, O.O. Coker,  
234 A.W.H. Chan, F.K.L. Chan, J.J.Y. Sung, J. Yu, *Peptostreptococcus anaerobius* promotes  
235 colorectal carcinogenesis and modulates tumour immunity, *Nat Microbiol* 4(12) (2019)  
236 2319-2330.
- 237 [6] L. Chung, E. Thiele Orberg, A.L. Geis, J.L. Chan, K. Fu, C.E. DeStefano Shields,  
238 C.M. Dejea, P. Fathi, J. Chen, B.B. Finard, A.J. Tam, F. McAllister, H. Fan, X. Wu, S.  
239 Ganguly, A. Lebid, P. Metz, S.W. Van Meerbeke, D.L. Huso, E.C. Wick, D.M. Pardoll,  
240 F. Wan, S. Wu, C.L. Sears, F. Housseau, *Bacteroides fragilis* toxin coordinates a pro-  
241 carcinogenic inflammatory cascade via targeting of colonic epithelial cells, *Cell Host*  
242 *Microbe* 23(2) (2018) 203-214 e5.
- 243 [7] C. Pleguezuelos-Manzano, J. Puschhof, A. Rosendahl Huber, A. van Hoeck, H.M.  
244 Wood, J. Nomburg, C. Gurjao, F. Manders, G. Dalmasso, P.B. Stege, F.L. Paganelli,  
245 M.H. Geurts, J. Beumer, T. Mizutani, Y. Miao, R. van der Linden, S. van der Elst, C.  
246 Genomics England Research, K.C. Garcia, J. Top, R.J.L. Willems, M. Giannakis, R.  
247 Bonnet, P. Quirke, M. Meyerson, E. Cuppen, R. van Boxtel, H. Clevers, Mutational  
248 signature in colorectal cancer caused by genotoxic *pks(+)* *E. coli*, *Nature* 580(7802)  
249 (2020) 269-273.
- 250 [8] Z. He, R.Z. Gharaibeh, R.C. Newsome, J.L. Pope, M.W. Dougherty, S. Tomkovich,  
251 B. Pons, G. Mirey, J. Vignard, D.R. Hendrixson, C. Jobin, *Campylobacter jejuni*  
252 promotes colorectal tumorigenesis through the action of cytolethal distending toxin,  
253 *Gut* 68(2) (2019) 289-300.
- 254 [9] H.N. Bell, R.J. Rebernick, J. Goyert, R. Singhal, M. Kuljanin, S.A. Kerk, W. Huang,  
255 N.K. Das, A. Andren, S. Solanki, S.L. Miller, P.K. Todd, E.R. Fearon, C.A. Lyssiotis,  
256 S.P. Gygi, J.D. Mancias, Y.M. Shah, Reuterin in the healthy gut microbiome suppresses  
257 colorectal cancer growth through altering redox balance, *Cancer Cell* 40(2) (2022) 185-  
258 200 e6.

- 259 [10] N. Sugimura, Q. Li, E.S.H. Chu, H.C.H. Lau, W. Fong, W. Liu, C. Liang, G.  
260 Nakatsu, A.C.Y. Su, O.O. Coker, W.K.K. Wu, F.K.L. Chan, J. Yu, *Lactobacillus*  
261 *gallinarum* modulates the gut microbiota and produces anti-cancer metabolites to  
262 protect against colorectal tumourigenesis, *Gut* (2021).
- 263 [11] Q. Li, W. Hu, W.X. Liu, L.Y. Zhao, D. Huang, X.D. Liu, H. Chan, Y. Zhang, J.D.  
264 Zeng, O.O. Coker, W. Kang, S.S.M. Ng, L. Zhang, S.H. Wong, T. Gin, M.T.V. Chan,  
265 J.L. Wu, J. Yu, W.K.K. Wu, *Streptococcus thermophilus* inhibits colorectal  
266 tumorigenesis through secreting beta-galactosidase, *Gastroenterology* 160(4) (2021)  
267 1179-1193 e14.
- 268 [12] H. Jin, G. Hu, C. Sun, Y. Duan, Z. Zhang, Z. Liu, X.M. Zhao, W.H. Chen,  
269 mBodyMap: a curated database for microbes across human body and their associations  
270 with health and diseases, *Nucleic Acids Res* 50(D1) (2022) D808-D816.
- 271 [13] L. Cheng, C. Qi, H. Zhuang, T. Fu, X. Zhang, gutMDisorder: a comprehensive  
272 database for dysbiosis of the gut microbiota in disorders and interventions, *Nucleic*  
273 *Acids Res* 48(D1) (2020) D554-D560.
- 274 [14] S. Wu, C. Sun, Y. Li, T. Wang, L. Jia, S. Lai, Y. Yang, P. Luo, D. Dai, Y.Q. Yang,  
275 Q. Luo, N.L. Gao, K. Ning, L.J. He, X.M. Zhao, W.H. Chen, GMrepo: a database of  
276 curated and consistently annotated human gut metagenomes, *Nucleic Acids Res* 48(D1)  
277 (2020) D545-D553.
- 278 [15] L. Li, Q. Jing, S. Yan, X. Liu, Y. Sun, D. Zhu, D. Wang, C. Hao, D. Xue, Amadis:  
279 A comprehensive database for association between microbiota and disease, *Front*  
280 *Physiol* 12 (2021) 697059.
- 281 [16] S. Roy, G. Trinchieri, Microbiota: a key orchestrator of cancer therapy, *Nat Rev*  
282 *Cancer* 17(5) (2017) 271-285.
- 283 [17] B. Routy, E. Le Chatelier, L. Derosa, C.P.M. Duong, M.T. Alou, R. Daillere, A.  
284 Fluckiger, M. Messaoudene, C. Rauber, M.P. Roberti, M. Fidelle, C. Flament, V.  
285 Poirier-Colame, P. Opolon, C. Klein, K. Iribarren, L. Mondragon, N. Jacquelot, B. Qu,  
286 G. Ferrere, C. Clemenson, L. Mezquita, J.R. Masip, C. Naltet, S. Brosseau, C.  
287 Kaderbhai, C. Richard, H. Rizvi, F. Levenez, N. Galleron, B. Quinquis, N. Pons, B.  
288 Ryffel, V. Minard-Colin, P. Gonin, J.C. Soria, E. Deutsch, Y. Loriot, F. Ghiringhelli, G.  
289 Zalcman, F. Goldwasser, B. Escudier, M.D. Hellmann, A. Eggermont, D. Raoult, L.  
290 Albiges, G. Kroemer, L. Zitvogel, Gut microbiome influences efficacy of PD-1-based  
291 immunotherapy against epithelial tumors, *Science* 359(6371) (2018) 91-97.
- 292 [18] V. Matson, J. Fessler, R. Bao, T. Chongsuwat, Y. Zha, M.L. Alegre, J.J. Luke, T.F.  
293 Gajewski, The commensal microbiome is associated with anti-PD-1 efficacy in  
294 metastatic melanoma patients, *Science* 359(6371) (2018) 104-108.
- 295 [19] Y. Gao, D. Bi, R. Xie, M. Li, J. Guo, H. Liu, X. Guo, J. Fang, T. Ding, H. Zhu, Y.  
296 Cao, M. Xing, J. Zheng, Q. Xu, Q. Xu, Q. Wei, H. Qin, *Fusobacterium nucleatum*  
297 enhances the efficacy of PD-L1 blockade in colorectal cancer, *Signal Transduct Target*  
298 *Ther* 6(1) (2021) 398.
- 299 [20] N. Dizman, L. Meza, P. Bergerot, M. Alcantara, T. Dorff, Y. Lyou, P. Frankel, Y.  
300 Cui, V. Mira, M. Llamas, J. Hsu, Z. Zengin, N. Salgia, S. Salgia, J. Malhotra, N. Chawla,

301 A. Chehrazi-Raffle, R. Muddasani, J. Gillece, L. Reining, J. Trent, M. Takahashi, K.  
302 Oka, S. Higashi, M. Kortylewski, S.K. Highlander, S.K. Pal, Nivolumab plus  
303 ipilimumab with or without live bacterial supplementation in metastatic renal cell  
304 carcinoma: a randomized phase 1 trial, *Nat Med* 28(4) (2022) 704-712.  
305 [21] R.M. Pollet, E.H. D'Agostino, W.G. Walton, Y. Xu, M.S. Little, K.A. Biernat, S.J.  
306 Pellock, L.M. Patterson, B.C. Creekmore, H.N. Isenberg, R.R. Bahethi, A.P. Bhatt, J.  
307 Liu, R.Z. Gharaibeh, M.R. Redinbo, An Atlas of beta-glucuronidases in the human  
308 intestinal microbiome, *Structure* 25(7) (2017) 967-977 e5.  
309 [22] K. Dubin, M.K. Callahan, B. Ren, R. Khanin, A. Viale, L. Ling, D. No, A.  
310 Gobourne, E. Littmann, C. Huttenhower, E.G. Pamer, J.D. Wolchok, Intestinal  
311 microbiome analyses identify melanoma patients at risk for checkpoint-blockade-  
312 induced colitis, *Nat Commun* 7 (2016) 10391.  
313 [23] T. Yu, F. Guo, Y. Yu, T. Sun, D. Ma, J. Han, Y. Qian, I. Kryczek, D. Sun, N.  
314 Nagarsheth, Y. Chen, H. Chen, J. Hong, W. Zou, J.Y. Fang, *Fusobacterium nucleatum*  
315 promotes chemoresistance to colorectal cancer by modulating autophagy, *Cell* 170(3)  
316 (2017) 548-563 e16.  
317 [24] L. Derosa, B. Routy, A.M. Thomas, V. Iebba, G. Zalcman, S. Friard, J. Mazieres,  
318 C. Audigier-Valette, D. Moro-Sibilot, F. Goldwasser, C.A.C. Silva, S. Terrisse, M.  
319 Bonvalet, A. Scherpereel, H. Pegliasco, C. Richard, F. Ghiringhelli, A. Elkrief, A.  
320 Desilets, F. Blanc-Durand, F. Cumbo, A. Blanco, R. Boidot, S. Chevrier, R. Daillere, G.  
321 Kroemer, L. Alla, N. Pons, E. Le Chatelier, N. Galleron, H. Roume, A. Dubuisson, N.  
322 Bouchard, M. Messaoudene, D. Drubay, E. Deutsch, F. Barlesi, D. Planchard, N. Segata,  
323 S. Martinez, L. Zitvogel, J.C. Soria, B. Besse, Intestinal *Akkermansia muciniphila*  
324 predicts clinical response to PD-1 blockade in patients with advanced non-small-cell  
325 lung cancer, *Nat Med* 28(2) (2022) 315-324.

326

1 **Figure captions**

2

3 **Figure 1.** The framework of MADET, including data curation, database construction  
4 and utilities.

5 **Figure 2.** Statistics of curated studies for microbiota-drug associations. The collected  
6 studies have been categorized by (A) treatment approaches, (B) cancer types (one study  
7 recruited both kidney cancer patients and lung cancer patients), (C) countries where the  
8 study was conducted, and (D) the strength of evidence.

9 **Figure 3.** Major functions provided in MADET, including browsing, searching,  
10 downloading, and uploading.

11

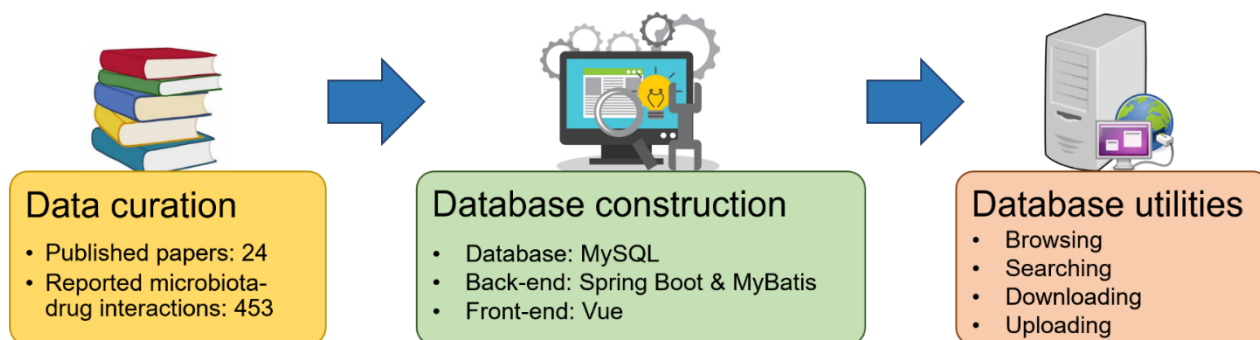

1

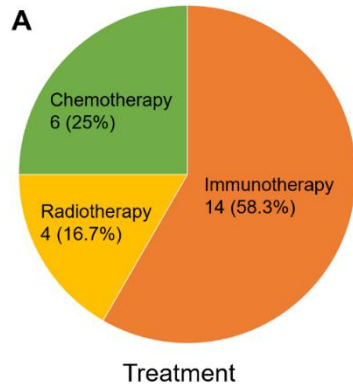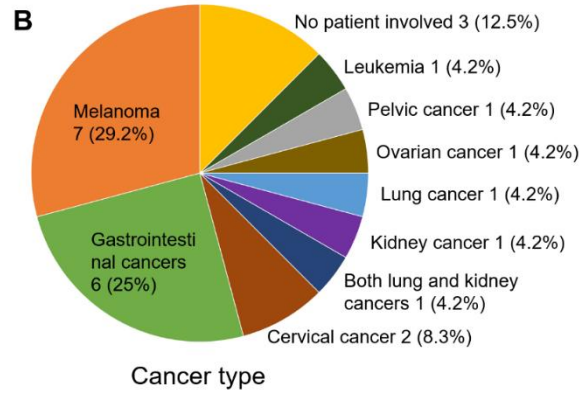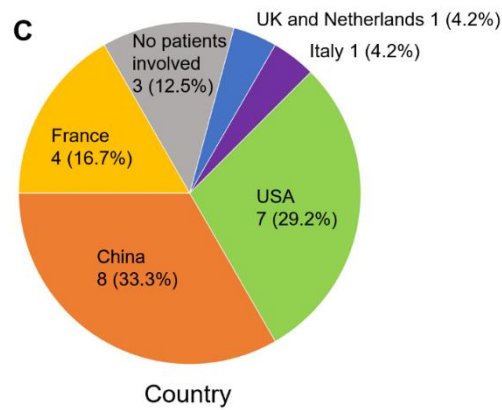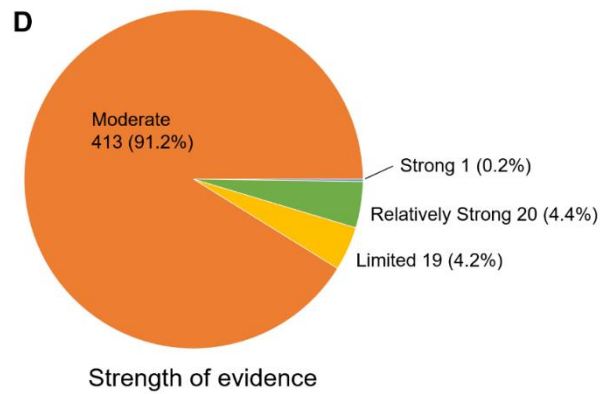

1

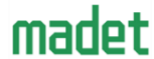

### Browse function

| Bacterium                           | Treatment                         | Potential effects on efficacy | Potential effects on toxicity                | Cancer type |
|-------------------------------------|-----------------------------------|-------------------------------|----------------------------------------------|-------------|
| <i>Akkermansia muciniphila</i>      | Anti-PD-1                         | Enhancement                   | n/a                                          | Lung cancer |
| <i>Bacteroides intestinalis</i>     | Combined CTLA-4 and PD-1 blockade | n/a                           | Exacerbation (immune-related adverse events) | Melanoma    |
| <i>Parabacteroides distasonis</i>   | Combined CTLA-4 and PD-1 blockade | Enhancement                   | n/a                                          | Melanoma    |
| <i>Bifidobacterium adolescentis</i> | Anti-CTLA-4 or anti-PD-1          | Enhancement                   | n/a                                          | Melanoma    |
| <i>Bifidobacterium longum</i>       | Anti-CTLA-4 or anti-PD-1          | Enhancement                   | n/a                                          | Melanoma    |

**Other information provided:** Reference, PubMed ID, Strength of evidence, Country where the study was conducted, Potential mechanism, Method of sequencing, Taxonomy level

### Upload function

Microbiota-drug association:

Reference:

Name:

Email:

[Submit](#)

### Search function

Bacterium Treatment Cancer type

[Search](#)

↓

| Bacterium                                                                                                                                                                                                                                                                                                                                                                                                                                                                                                   | Treatment                                    | Disease                                          | Potential effects on efficacy | Potential effects on toxicity |
|-------------------------------------------------------------------------------------------------------------------------------------------------------------------------------------------------------------------------------------------------------------------------------------------------------------------------------------------------------------------------------------------------------------------------------------------------------------------------------------------------------------|----------------------------------------------|--------------------------------------------------|-------------------------------|-------------------------------|
| > <i>Akkermansia muciniphila</i>                                                                                                                                                                                                                                                                                                                                                                                                                                                                            | Anti-PD-1                                    | Patients with lung cancer or kidney cancer       | Enhancement                   | n/a                           |
| <p>Bacterium: <i>Akkermansia muciniphila</i> Treatment: Anti-PD-1</p> <p>Potential effects on efficacy: Enhancement Potential effects on toxicity: n/a</p> <p>Taxonomy level: Species Disease: Patients with lung cancer or kidney cancer</p> <p>Method of sequencing: Metagenomic sequencing Strength Of Evidence: Relatively strong</p> <p>Reference: Bertrand Routy, Science, 2017 Potential Mechanisms: Immunomodulation</p> <p>Other: Drug not specified Country: France</p> <p>PubMedID: 29097494</p> |                                              |                                                  |                               |                               |
| > <i>Akkermansia muciniphila</i>                                                                                                                                                                                                                                                                                                                                                                                                                                                                            | Anti-PD-1                                    | Patients with non-small-cell lung cancer (NSCLC) | Enhancement                   | n/a                           |
| > <i>Akkermansia muciniphila</i>                                                                                                                                                                                                                                                                                                                                                                                                                                                                            | Anti-CTLA-4, anti-PD-1, or their combination | Patients with melanoma                           | Enhancement                   | n/a                           |
| > <i>Akkermansia muciniphila</i>                                                                                                                                                                                                                                                                                                                                                                                                                                                                            | FOLFFOX                                      | Mouse model with colon cancer                    | Enhancement                   | n/a                           |

### Download function

| File name  | File type | Download                 |
|------------|-----------|--------------------------|
| Madet.xlsx | Excel     | <a href="#">Download</a> |
| Madet.sql  | MySQL     | <a href="#">Download</a> |



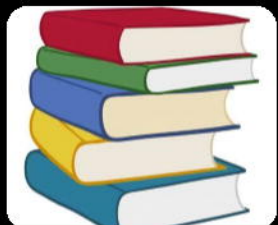

## Data curation

- Published papers: 24
- Reported microbiota-drug interactions: 453

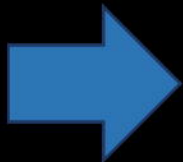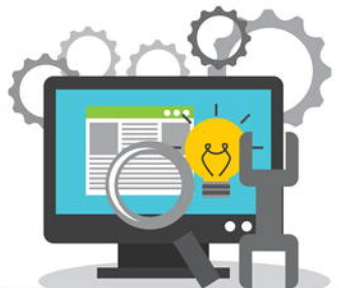

## Database construction

- Database: MySQL
- Back-end: Spring Boot & MyBatis
- Front-end: Vue

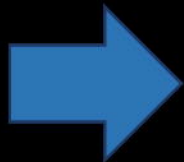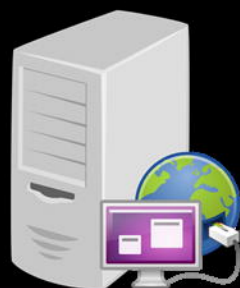

## Database utilities

- Browsing
- Searching
- Downloading
- Uploading

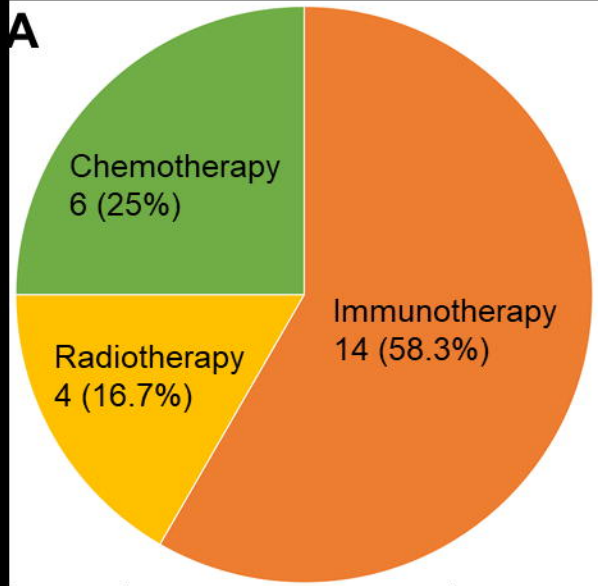

Treatment

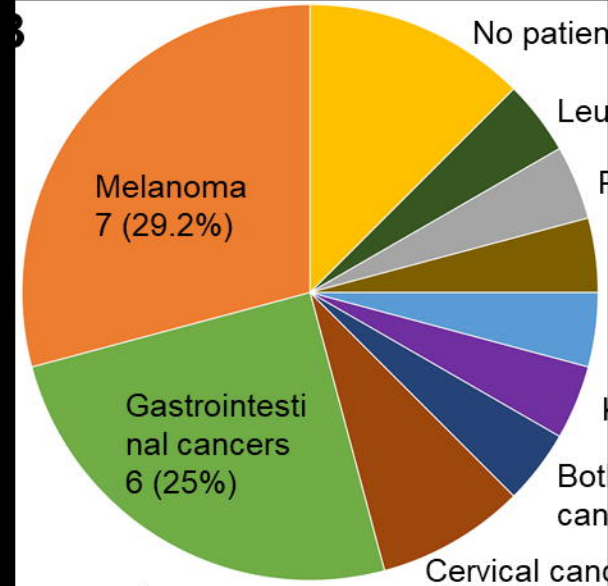

Cancer type

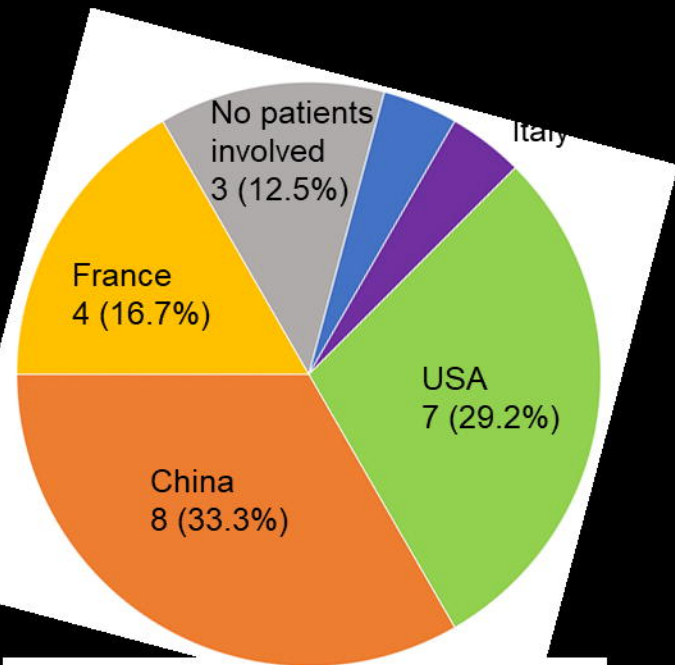

Country

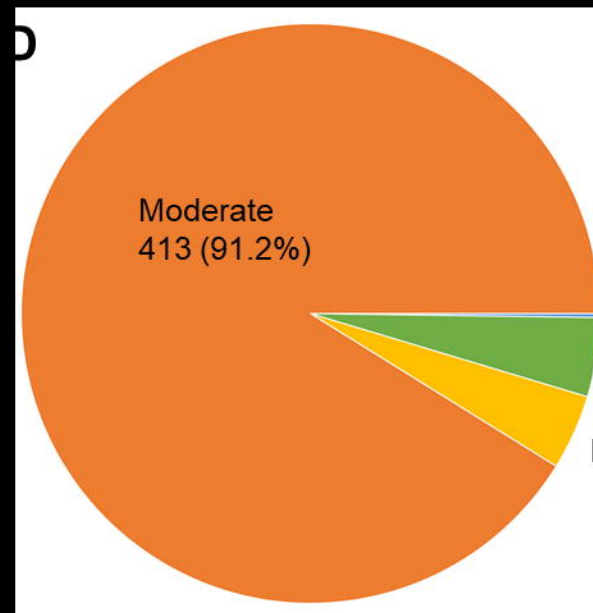

Strength of evidence

| Bacterium                           | Treatment                         | Potential effects on efficacy | Potential effects on toxicity                | Cancer type |
|-------------------------------------|-----------------------------------|-------------------------------|----------------------------------------------|-------------|
| <i>Bacteroides intestinalis</i>     | Combined CTLA-4 and PD-1 blockade | n/a                           | Exacerbation (immune-related adverse events) | Melanoma    |
| <i>Bifidobacterium adolescentis</i> | Anti-CTLA-4 or anti-PD-1          | Enhancement                   | n/a                                          | Melanoma    |

Bacterium
Treatment
Cancer type

Search

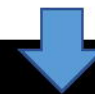

| Bacterium                                                                                                                                                                                                                                                  | Treatment                                    | Disease                                                                                                                                                                                                                | Potential effects on efficacy | Potential effects on toxicity |
|------------------------------------------------------------------------------------------------------------------------------------------------------------------------------------------------------------------------------------------------------------|----------------------------------------------|------------------------------------------------------------------------------------------------------------------------------------------------------------------------------------------------------------------------|-------------------------------|-------------------------------|
| <i>Akkermansia muciniphila</i>                                                                                                                                                                                                                             | Anti-PD-1                                    | Patients with lung cancer or kidney cancer                                                                                                                                                                             | Enhancement                   | n/a                           |
| Bacterium <i>Akkermansia muciniphila</i><br>Potential effects on efficacy Enhancement<br>Taxonomy level Species<br>Method of sequencing Metagenomic sequencing<br>Reference Bertrand Routy, Science, 2017<br>Other Drug not specified<br>PubMedID 29097494 |                                              | Treatment Anti-PD-1<br>Potential effects on toxicity n/a<br>Disease Patients with lung cancer or kidney cancer<br>Strength Of Evidence Relatively strong<br>Potential Mechanisms Immunounomodulation<br>Country France |                               |                               |
| > <i>Akkermansia muciniphila</i>                                                                                                                                                                                                                           | Anti-PD-1                                    | Patients with non-small-cell lung cancer (NSCLC)                                                                                                                                                                       | Enhancement                   | n/a                           |
| > <i>Akkermansia muciniphila</i>                                                                                                                                                                                                                           | Anti-CTLA-4, anti-PD-1, or their combination | Patients with melanoma                                                                                                                                                                                                 | Enhancement                   | n/a                           |
| > <i>Akkermansia Muciniphila</i>                                                                                                                                                                                                                           | FOLFOX                                       | Mouse model with colon cancer                                                                                                                                                                                          | Enhancement                   | n/a                           |

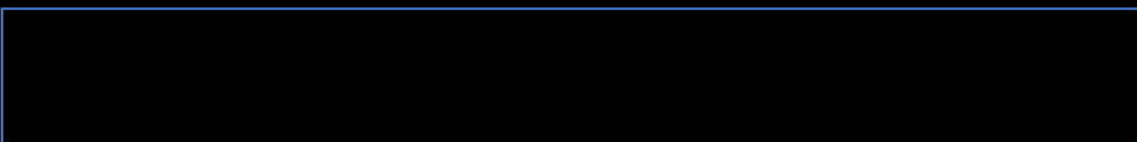

Microbiota-drug association:

Reference:

Name:

Email:

Submit

| File name | File type | Download                 |
|-----------|-----------|--------------------------|
| Madet.sql | MySQL     | <a href="#">Download</a> |
